# Supplementary material for: The impact of health disorders on automated sensor measures and feed intake in lactating Holstein dairy cattle
Source: Frontiers journal article supplement (doi:10.3389/fanim.2022.1064205), 2023-01-19
Supplement: Data_Sheet_1.docx [file Data_Sheet_1.docx]

**Supplementary Material**

**
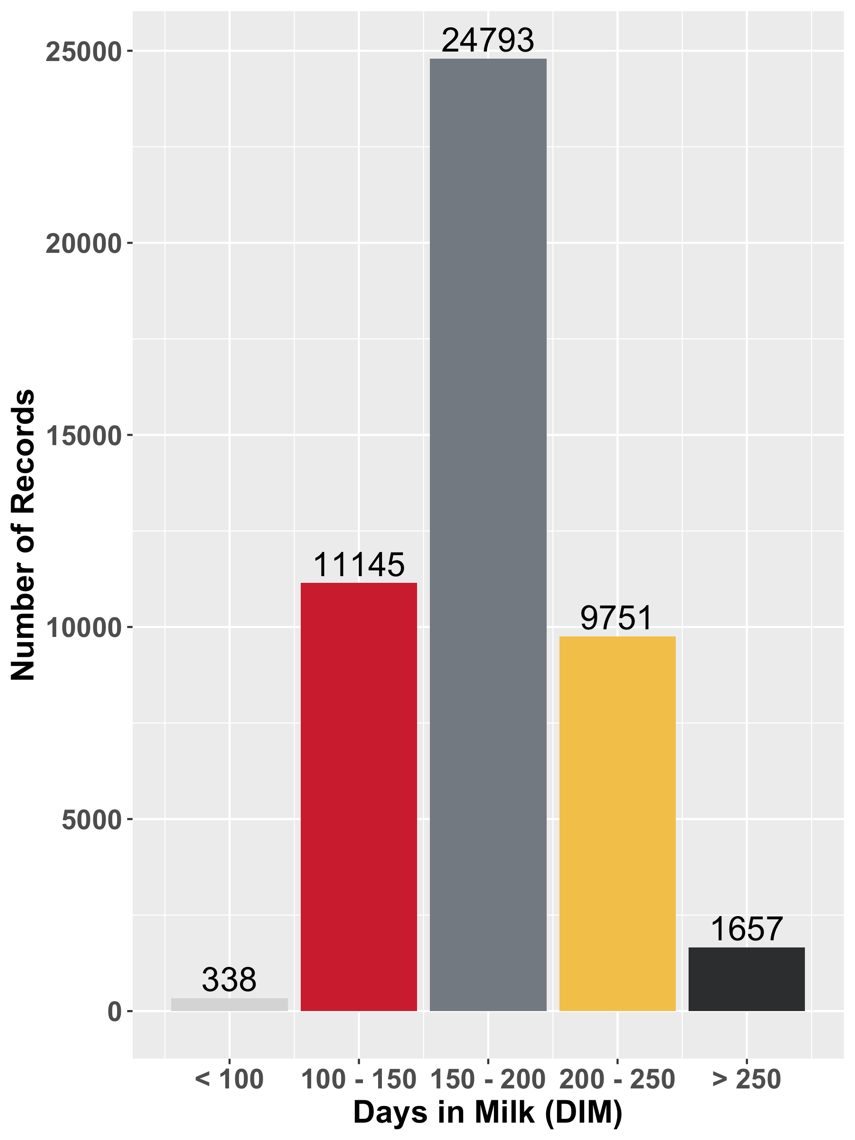
**

**Supplementary Figure 1:** Distribution of days in milk of cows at the start of feed intake recording (i.e., study day 1).


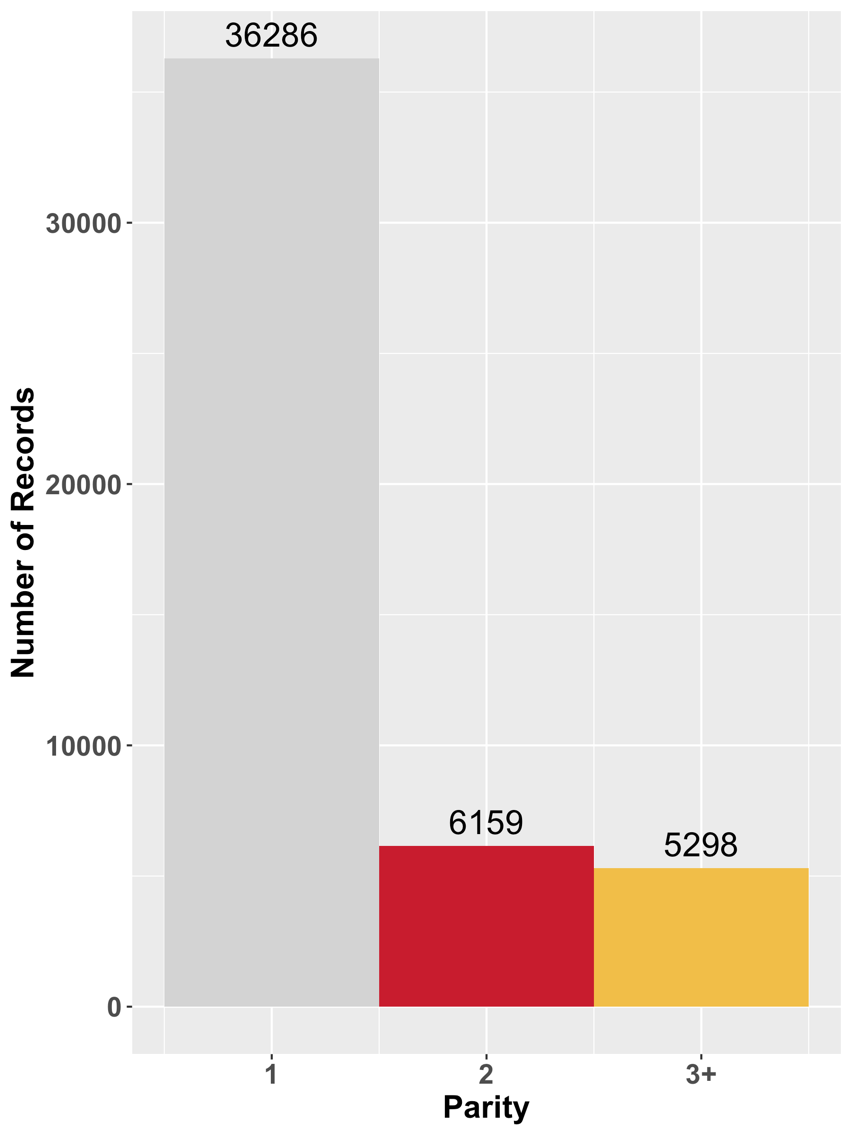


**Supplementary Figure 2:** Distribution of cow parity classified as 1, 2, and 3+ in total number (count) of days of feed intake data collected (Y).

**Supplementary Table 1:** Summary statistics of traits and model covariates recorded during the study

| Trait | Units | n | Mean | SD | Minimum | 1st Quartile | 3rd Quartile | Maximum |
| --- | --- | --- | --- | --- | --- | --- | --- | --- |
| Days in milk | Days | 47684 | 126.20 | 36.76 | 24.00 | 100.00 | 148.00 | 313.00 |
| Milk yield, | kg/d | 46523 | 39.07 | 7.38 | 0.91 | 34.38 | 43.45 | 86.64 |
| Average fat yield | kg/d | 45762 | 1.43 | 0.38 | 0.03 | 1.19 | 1.63 | 4.14 |
| Average protein yield | kg/d | 45774 | 1.18 | 0.21 | 0.03 | 1.05 | 1.30 | 2.46 |
| Average lactose yield | kg/d | 45774 | 1.90 | 0.35 | 0.04 | 1.68 | 2.12 | 4.08 |
| MBW1 | kg/d | 45737 | 122.60 | 10.02 | 91.20 | 115.50 | 128.90 | 164.70 |
| BCS2 | 1 – 5 scale | 45028 | 3.27 | 0.36 | 2.00 | 3.00 | 3.50 | 4.50 |
| Dry matter intake | kg/d | 45023 | 22.72 | 4.29 | 1.97 | 19.96 | 25.22 | 48.61 |

1MBW = metabolic body weight; BW0.75

2BCS = body condition score

**Supplementary Table 2:** Regression coefficients of adjusted sensor measurements1 on dry matter intake (**DMI**) from the model also including systematic effects and health (i.e., model **[4]**).

| Sensor measure1 | Units | Sensor | Estimate ± Std. Error | *P* – value |
| --- | --- | --- | --- | --- |
| Activity – avg2 | Activity Units | CowSense ear tag | 0.000061 ± 0.000015 | < 0.0001 |
| SmaXtec rumen bolus | 0.47 ± 0.055 | < 0.0001 |
| SCR ear tag | 0.0015 ± 0.01 | 0.88 |
| Activity – total3 | Activity Units | CowSense ear tag | 2.019 E-6 ± 0.0 | 0.00087 |
| SmaXtec rumen bolus | 0.0029 ± 0.00036 | < 0.0001 |
| SCR ear tag | 0.00012 ± 0.00083 | 0.88 |
| Temperature | °C | CowSense ear tag | 0.018 ± 0.062 | 0.78 |
| SmaXtec rumen bolus | -3.38 ± 0.26 | < 0.0001 |
| pH | pH Units | SmaXtec rumen bolus | -0.14 ± 0.40 | 0.72 |
| Rumination – avg2 | Minutes | SCR ear tag | 0.099 ± 0.0063 | < 0.0001 |
| Rumination – total3 | Minutes | SCR ear tag | 0.0083 ± 0.00053 | < 0.0001 |
| SCRAct – avg2  SCRRum – avg2 | Activity Units  Minutes | SCR ear tag  SCR ear tag | 0.046 ± 0.01  0.11 ± 0.0066 | < 0.0001  < 0.0001 |
| SCRAct – total3  SCRRum – total3 | Activity Units  Minutes | SCR ear tag  SCR ear tag | 0.0038 ± 0.00085  0.0089 ± 0.00055 | < 0.0001  < 0.0001 |

1Sensor measurements adjusted for contemporary group, days in milk, and parity

2Average (avg) refers to the daily average across all sensor measurement reporting periods

3Total refers to the daily summed value for a sensor measurement

**Supplementary Table 3:** Regression coefficients of sensor measurements1 on dry matter intake (**DMI**) from the full model including systematic effects, energy sinks2, and health (i.e., model **[5]**).

| Sensor measure1 | Units | Sensor | Estimate ± Std. Error | *P* – value |
| --- | --- | --- | --- | --- |
| Activity – avg3 | Activity Units | CowSense ear tag | 0.000044 ± 0.000015 | 0.0042 |
| SmaXtec rumen bolus | 0.24 ± 0.064 | 0.0002 |
| SCR ear tag | -0.01 ± 0.0089 | 0.26 |
| Activity – total4 | Activity Units | CowSense ear tag | 1.37 E-6 ± 0.0 | 0.025 |
| SmaXtec rumen bolus | 0.0017 ± 0.00045 | 0.00016 |
| SCR ear tag | -0.00084 ± 0.00074 | 0.26 |
| Temperature | °C | CowSense ear tag | 0.018 ± 0.059 | 0.76 |
| SmaXtec rumen bolus | -3.47 ± 0.32 | < 0.0001 |
| pH | pH Units | SmaXtec rumen bolus | 1.10 ± 0.44 | 0.012 |
| Rumination – avg3 | Minutes | SCR ear tag | 0.074 ± 0.0059 | < 0.0001 |
| Rumination – total4 | Minutes | SCR ear tag | 0.0062 ± 0.00049 | < 0.0001 |
| SCRAct – avg3  SCRRum – avg3 | Activity Units  Minutes | SCR ear tag  SCR ear tag | 0.022 ± 0.0092  0.078 ± 0.0061 | 0.019  < 0.0001 |
| SCRAct – total4  SCRRum – total4 | Activity Units  Minutes | SCR ear tag  SCR ear tag | 0.0018 ± 0.00077  0.0065 ± 0.00051 | 0.019  < 0.0001 |

1Sensor measurements adjusted for contemporary group, days in milk, and parity (systematic effects)

2Energy sink traits include milk weight, milk fat, protein and lactose, metabolic body weight, and body condition score

3Average (avg) refers to the daily average across all sensor measurement reporting periods

4Total refers to the daily summed value for a sensor measurement
